# Supplementary material for: Causal relationship between Alzheimer’s disease and cardiovascular disease: a bidirectional Mendelian randomization analysis
Source: publisher site journal article supplement (doi:10.18632/aging.205013), 2023-09-02
Supplement: Supplementary file [file aging-v15i17-205013-supplementary-material-SD1.pdf]

SUPPLEMENTARY FIGURES

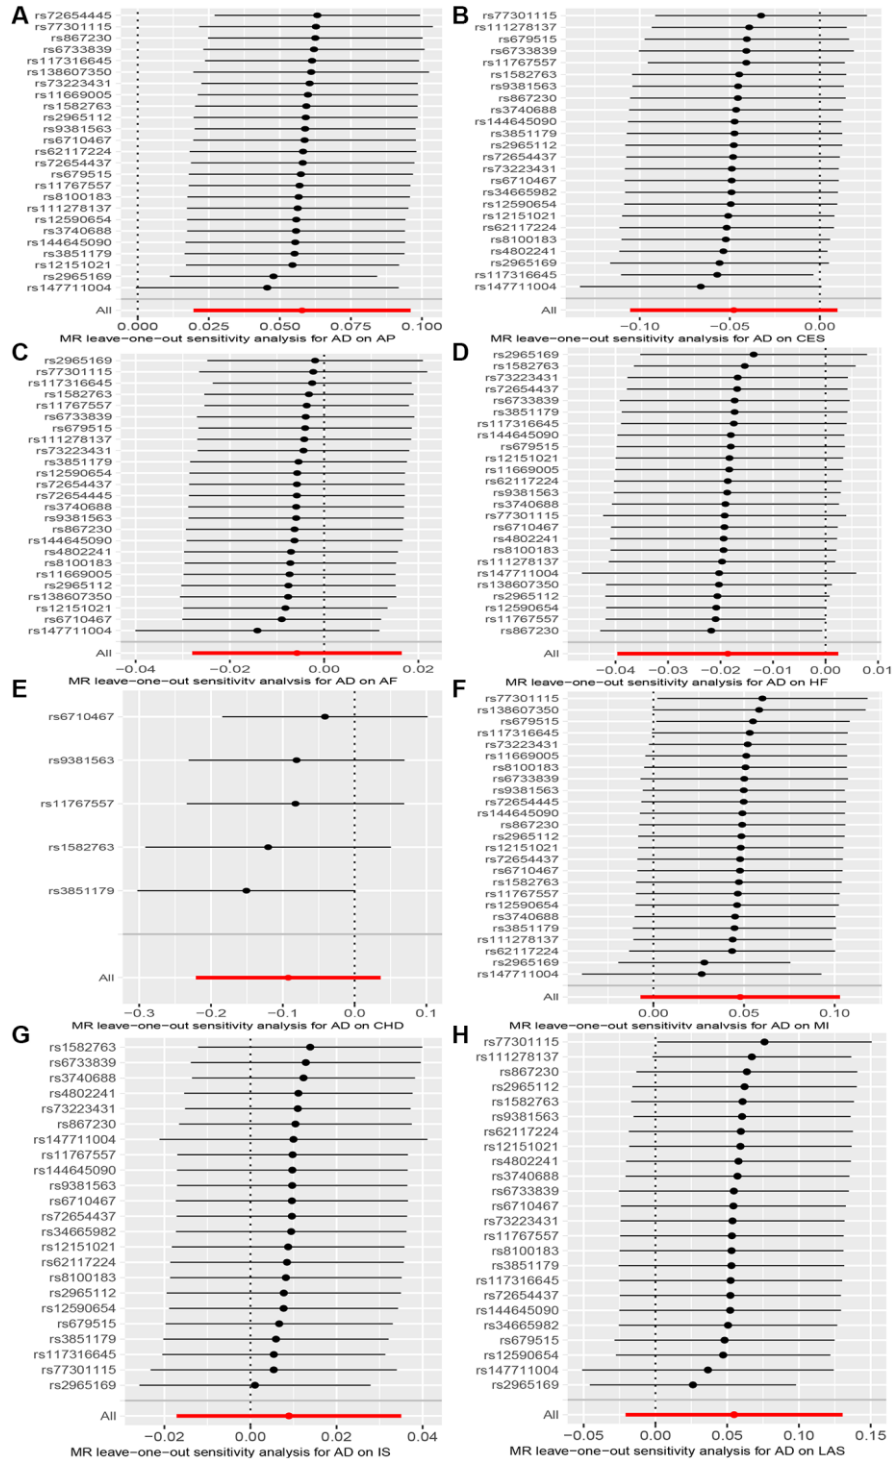

**Supplementary Figure 1. MR leave-one-out analysis plots for the relationships of AD with CVD.** (A) Exposure: AD, outcome: Angina pectoris (AP); (B) Exposure: AD, outcome: Cardioembolic stroke (CES); (C) Exposure: AD, outcome: Atrial fibrillation (AF); (D) Exposure: AD, outcome: Heart failure (HF); (E) Exposure: AD, outcome: Coronary heart disease (CHD); (F) Exposure: AD, outcome: Myocardial infarction (MI); (G) Exposure: AD, outcome: Ischemic stroke (IS); (H) Exposure: AD, outcome: Large-artery atherosclerotic stroke (LAS). Abbreviations: AD: Alzheimer’s disease; CVD: cardiovascular disease.

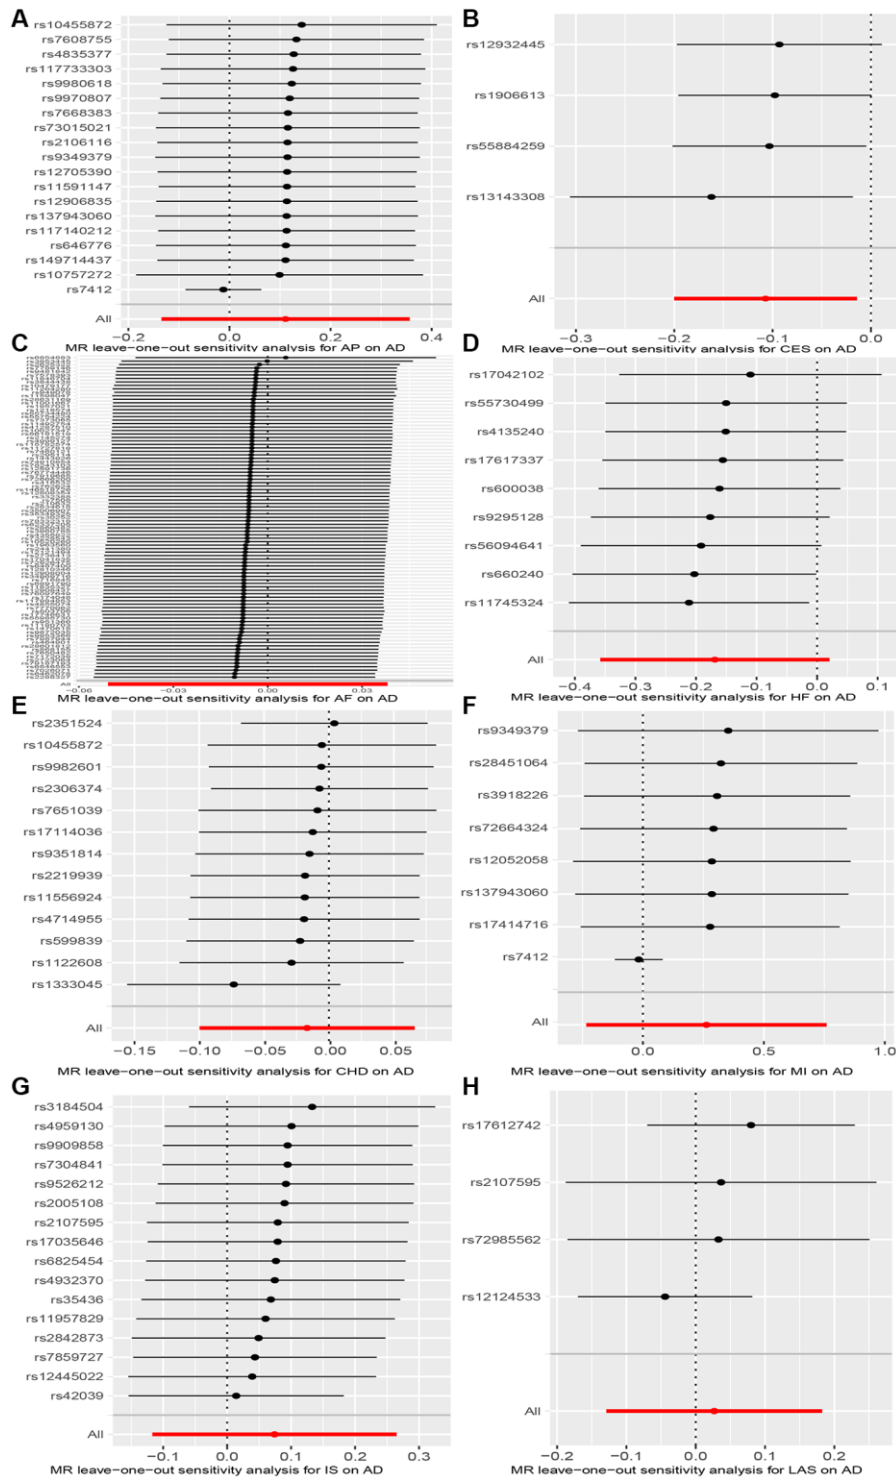

**Supplementary Figure 2. MR leave-one-out analysis plots for the relationships of CVD with AD.** (A) Exposure: Angina pectoris (AP), outcome: Alzheimer’s disease (AD); (B) Exposure: Cardioembolic stroke (CES), outcome: Alzheimer’s disease (AD); (C) Exposure: Atrial fibrillation (AF), outcome: Alzheimer’s disease (AD); (D) Exposure: AD, outcome: Heart failure (HF); (E) Exposure: Coronary heart disease (CHD), outcome: Alzheimer’s disease (AD); (F) Exposure: Myocardial infarction (MI), outcome: Alzheimer’s disease (AD); (G) Exposure: Ischemic stroke (IS), outcome: Alzheimer’s disease (AD); (H) Exposure: Large-artery atherosclerotic stroke (LAS), outcome: Alzheimer’s disease (AD). Abbreviation: CVD; cardiovascular disease.

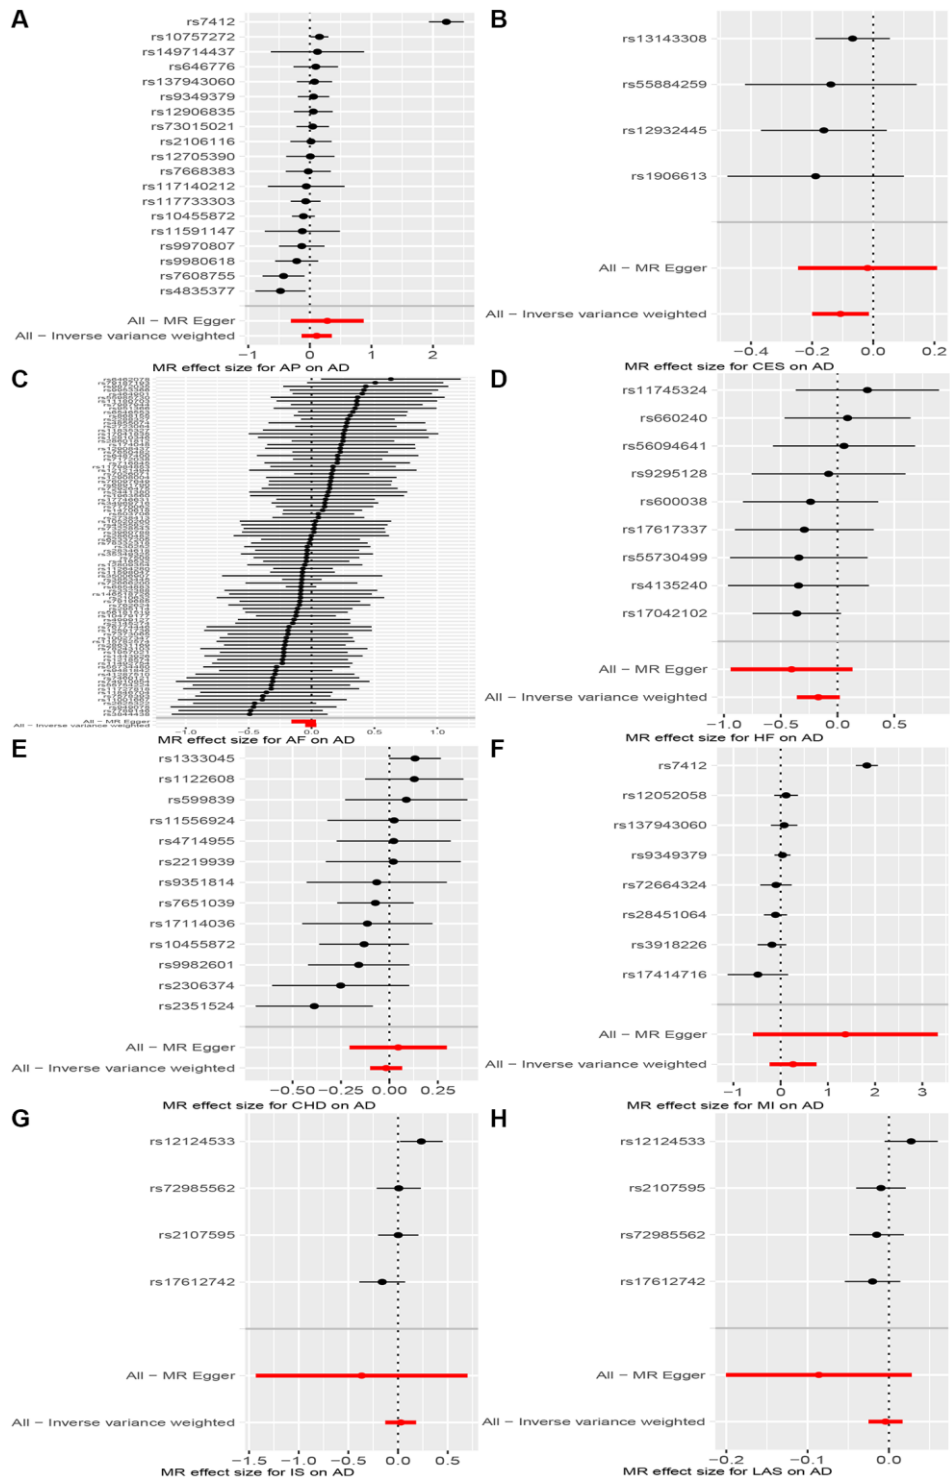

**Supplementary Figure 3. Mendelian randomization effects forest plots for individual SNPs with CVD as the exposure, AD as the outcome.** This figure showed the forest plots for individual SNPs with CVD as the exposure, AD as the outcome. The dark red marker points indicated All-IVW and All-MR Egger. (A) Exposure: Angina pectoris (AP), outcome: Alzheimer’s disease (AD); (B) Exposure: Cardioembolic stroke (CES), outcome: Alzheimer’s disease (AD); (C) Exposure: Atrial fibrillation (AF), outcome: Alzheimer’s disease (AD); (D) Exposure: AD, outcome: Heart failure (HF); (E) Exposure: Coronary heart disease (CHD), outcome: Alzheimer’s disease (AD); (F) Exposure: Myocardial infarction (MI), outcome: Alzheimer’s disease (AD); (G) Exposure: Ischemic stroke (IS), outcome: Alzheimer’s disease (AD); (H) Exposure: Large-artery atherosclerotic stroke (LAS), outcome: Alzheimer’s disease (AD). Abbreviation: CVD: cardiovascular disease.

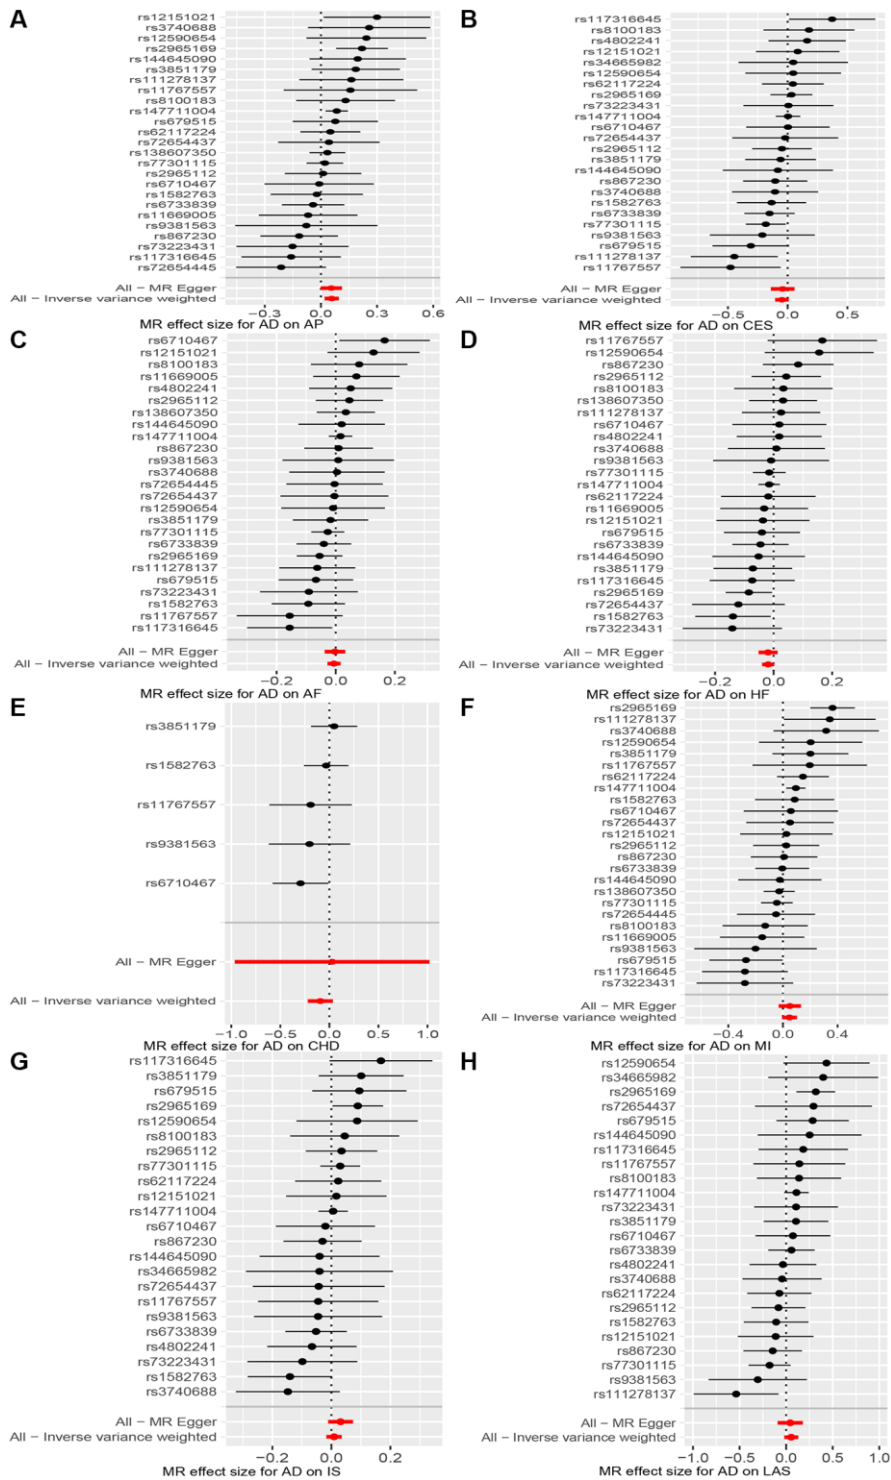

**Supplementary Figure 4. Mendelian randomization effects forest plots for individual SNPs with AD as the exposure, CVD as the outcome.** This figure showed the forest plots for individual SNPs with AD as the exposure, CVD as the outcome. The dark red marker points indicated All-IVW and All-MR Egger. **(A)** Exposure: AD, outcome: Angina pectoris (AP); **(B)** Exposure: AD, outcome: Cardioembolic stroke (CES); **(C)** Exposure: AD, outcome: Atrial fibrillation (AF); **(D)** Exposure: AD, outcome: Heart failure (HF); **(E)** Exposure: AD, outcome: Coronary heart disease (CHD); **(F)** Exposure: AD, outcome: Myocardial infarction (MI); **(G)** Exposure: AD, outcome: Ischemic stroke (IS); **(H)** Exposure: AD, outcome: Large-artery atherosclerotic stroke (LAS). Abbreviations: AD: Alzheimer’s disease; CVD: cardiovascular disease.
